# Supplementary material for: Pollinator Proboscis Length Plays a Key Role in Floral Integration of Honeysuckle Flowers (Lonicera spp.)
Source: MDPI journal article supplement (doi:10.3390/plants12081629), 2023-04-12
Supplement: s1 [file s1]

**Table S3** Statistical results of the comparison of 14 phylogenetic structural equation models (PSEMs) based on AIC to determine the pathway that pollinators proboscis length mediate floral integration for the 11 *Lonicera* flowers. The models were constructed based on every possible combination of pathways among modules; we supposed that pollinator proboscis length was related to a single, two and three of the functional modules (accessibility, efficiency and attractiveness), respectively. The relationship between upper lip length and lower lip length was defined as being correlated errors, thus we only show the direct paths in each model. The best model was selected as the one with the lowest AIC value among those with a *P* value > 0.05 derived from Fisher's C test statistic and tests of d-separation and with no statistically significant missing paths between variables (indicated in the "Missing paths" column). The best-fitting SEM is marked in bold.

| No.      | Condition     | Direct paths |            |                    | Fisher's C    | <i>P</i> -value | AIC          | Missing paths* |
|----------|---------------|--------------|------------|--------------------|---------------|-----------------|--------------|----------------|
|          |               | 1st          | 2nd        | 3rd                |               |                 |              |                |
| 1        | single        | CTL*         | SH         | ULL                | 59.301        | 31.301          | 0            | -              |
| 2        | single        | CTL*         | SH         | DLL                | 53.511        | 25.511          | 0            | -              |
| <b>3</b> | <b>single</b> | <b>SH*</b>   | <b>CTL</b> | <b>ULL</b>         | <b>28.338</b> | <b>0.338</b>    | <b>0.844</b> | <b>None</b>    |
| 4        | single        | SH*          | CTL        | DLL                | 37.245        | 9.245           | 0.01         | None           |
| 5        | single        | ULL*         | CTL        | SH                 | 214.246       | 186.246         | 0            | -              |
| 6        | single        | DLL*         | CTL        | SH                 | 214.246       | 186.246         | 0            | -              |
| 7        | two           | CTL*         | SH*        | ULL <sup>1st</sup> | 267.048       | 241.048         | 0            | -              |
| 8        | two           | CTL*         | SH*        | DLL <sup>1st</sup> | 261.258       | 235.258         | 0            | -              |

|    |       |      |      |                    |         |         |   |   |
|----|-------|------|------|--------------------|---------|---------|---|---|
| 9  | two   | CTL* | SH*  | ULL <sup>2nd</sup> | 248.727 | 222.727 | 0 | - |
| 10 | two   | CTL* | SH*  | DLL <sup>2nd</sup> | 248.727 | 222.727 | 0 | - |
| 11 | two   | CTL* | ULL* | SH <sup>1st</sup>  | 95.324  | 69.324  | 0 | - |
| 12 | two   | CTL* | DLL* | SH <sup>1st</sup>  | 117.736 | 91.736  | 0 | - |
| 13 | two   | CTL* | ULL* | SH <sup>2nd</sup>  | 242.694 | 216.694 | 0 | - |
| 14 | two   | CTL* | DLL* | SH <sup>2nd</sup>  | 246.976 | 220.976 | 0 | - |
| 15 | two   | SH*  | ULL* | CTL <sup>1st</sup> | 87.309  | 61.309  | 0 | - |
| 16 | two   | SH*  | DLL* | CTL <sup>1st</sup> | 109.17  | 83.17   | 0 | - |
| 17 | two   | SH*  | ULL* | CTL <sup>2nd</sup> | 288.136 | 262.136 | 0 | - |
| 18 | two   | SH*  | DLL* | CTL <sup>2nd</sup> | 269.117 | 243.117 | 0 | - |
| 19 | three | CTL* | SH*  | ULL*               | 339.053 | 315.053 | 0 | - |
| 20 | three | CTL* | SH*  | DLL*               | 387.508 | 363.508 | 0 | - |

“\*” means the floral trait was direct correlated with pollinator proboscis. In each path, ordinal number demonstrates which the floral trait was connected to the trait in the third column. “-” indicates “not applicable”. Floral traits in models were corolla tube length (CTL), anther height stigma height (SH), upper and lower corolla lip length (ULL and LLL).
