# Supplementary material for: Pollinator Proboscis Length Plays a Key Role in Floral Integration of Honeysuckle Flowers (Lonicera spp.)
Source: MDPI journal article supplement (doi:10.3390/plants12081629), 2023-04-12
Supplement: s1 [file s1]

**Table S1** Information on the study sites, pollinator information (pollinator species and guilds, pollinator proboscis length and visitation rate of each pollinator guild) and population sizes for the 11 studied *Lonicera* species in each natural population.

| Species              | GPS<br>coordinate/<br>site<br>abbreviation | Altitude (m) | Pollinator species                | Pollinator<br>guild | Proboscis<br>length for each<br>pollinator (mm) | Visitation rate<br>(visiting<br>number/flower/20mi<br>n, N=30) | Population<br>sizes |
|----------------------|--------------------------------------------|--------------|-----------------------------------|---------------------|-------------------------------------------------|----------------------------------------------------------------|---------------------|
| <i>L. chrysantha</i> | 33°59'1"(N)<br>107°16'5"(E)<br>TB-SX       | 2106         | <i>Apis cerana</i>                | Honeybee            | 3.045±0.095,<br>N=28                            | 0.045±0.0085                                                   | > 200               |
|                      |                                            |              | <i>Bombus pyrosoma, B. flavus</i> | Bumblebee           | 7.817±0.201,<br>N=23                            | 0.057±0.0065                                                   |                     |
| <i>L. elisae</i>     | 34°00'2"(N)<br>107°17'5"(E)<br>TB-SX       | 1829         | <i>Apis cerana</i>                | Honeybee            | 3.045±0.095,<br>N=28                            | 0.0033±0.0019                                                  | > 100               |
|                      |                                            |              | <i>Osmia Sp.</i>                  | Leafcutter<br>bee   | 8.864±0.247,<br>N=19                            | 0.0824±0.0103                                                  |                     |
| <i>L. ferdinandi</i> | 34°04'2"(N)<br>107°21'2"(E)<br>TB-SX       | 1622         | <i>Apis cerana</i>                | Honeybee            | 3.045±0.095,<br>N=28                            | 0.0486±0.0067                                                  | > 100               |
|                      |                                            |              | <i>Bombus picipes</i>             | Bumblebee           | 7.817±0.201,<br>N=23                            | 0.01±0.0042                                                    |                     |

|                                    |                                       |      |                                                                               |              |                      |               |       |
|------------------------------------|---------------------------------------|------|-------------------------------------------------------------------------------|--------------|----------------------|---------------|-------|
| <i>L. gynochlamyde</i><br><i>a</i> | 31°25'5"(N)<br>110°21'5"(E)<br>SNJ-HB | 1456 | <i>Lasioglossum calceatum, L. scitulum</i>                                    | Solitary bee | 2.449±0.104,<br>N=20 | 0.012±0.0043  | > 100 |
|                                    |                                       |      | <i>Apis cerana</i>                                                            | Honeybee     | 3.045±0.095,<br>N=28 | 0.0574±0.0024 |       |
|                                    |                                       |      | <i>Bombus festivus, B. lucorum</i>                                            | Bumblebee    | 7.817±0.201,<br>N=23 | 0.032±0.0079  |       |
|                                    |                                       |      | <i>Ceratina chinensis</i>                                                     | Solitary bee | 2.449±0.104,<br>N=20 | 0.0132±0.0019 |       |
| <i>L. japonica</i>                 | 33°49'3"(N)<br>107°30'1"(E)<br>TB-SX  | 1372 | <i>Xylocopa sinensis, Bombus trifasciatus, Theretra nessus</i>                | Bumblebee    | 7.817±0.201,<br>N=23 | 0.0567±0.0075 | > 100 |
|                                    |                                       |      | <i>Macroglossum pyrrhosticta, M. bombylans, M. bombylans, Theretra nessus</i> | Hawkmoth     | 41.15±1.044,<br>N=6  | 0.011±0.0043  |       |

|                      |                                        |      |                                                        |              |                      |               |       |
|----------------------|----------------------------------------|------|--------------------------------------------------------|--------------|----------------------|---------------|-------|
| <i>L. maackii</i>    | 34°04'2"(N)<br>107°21'2"(E)<br>TB-SX   | 1622 | <i>Apis cerana</i>                                     | Honeybee     | 3.045±0.095,<br>N=28 | 0.103±0.0095  | > 300 |
| <i>L. pileata</i>    | 31°26'5"(N)<br>110°23'2"(E)<br>SNJ-HB  | 1178 | <i>Apis cerana</i>                                     | Honeybee     | 3.045±0.095,<br>N=28 | 0.0256±0.0131 | > 100 |
|                      |                                        |      | <i>Bombus festivus, B. pyrosoma</i>                    | Bumblebee    | 7.817±0.201,<br>N=23 | 0.0556±0.0212 |       |
|                      |                                        |      | <i>Ceratina chinensis</i>                              | Solitary bee | 2.449±0.104,<br>N=20 | 0.0254±0.0063 |       |
| <i>L. standishii</i> | 34°04'2"(N)<br>107°21'2"(E)<br>TB-SX   | 1647 | <i>Apis cerana</i>                                     | Honeybee     | 3.045±0.095,<br>N=28 | 0.0813±0.0101 | > 200 |
|                      |                                        |      | <i>Bombus lucorum, B. picipes, Episyrphus balteata</i> | Bumblebee    | 7.817±0.201,<br>N=23 | 0.005±0.0029  |       |
| <i>L. tangutica</i>  | 33°59'17"(N)<br>107°16'52"(E)<br>TB-SX | 2106 | <i>Bombus picipes</i>                                  | Bumblebee    | 7.817±0.201,<br>N=23 | 0.105±0.0244  | > 100 |

|                       |                                      |      |                                                                                     |              |                      |                |       |
|-----------------------|--------------------------------------|------|-------------------------------------------------------------------------------------|--------------|----------------------|----------------|-------|
| <i>L. tragophylla</i> | 34°01'2"(N)<br>107°18'3"(E)<br>TB-SX | 1648 | <i>Thereatra nesus,</i><br><i>Macroglossum bombylans, M.</i><br><i>pyrrhosticta</i> | Hawkmoth     | 41.15±1.044,<br>N=6  | 0.00959±0.0029 | > 100 |
| <i>L. webbiana</i>    | 34°00'4"(N)<br>107°17'5"(E)<br>TB-SX | 1844 | <i>Apis cerana</i>                                                                  | Honeybee     | 3.045±0.095,<br>N=28 | 0.0762±0.0074  | > 100 |
|                       |                                      |      | <i>Episyrphus balteata</i>                                                          | Bumblebee    | 7.817±0.201,<br>N=23 | 0.00815±0.0042 |       |
|                       |                                      |      | <i>Lasioglossum calceatum</i>                                                       | Solitary bee | 2.449±0.104,<br>N=20 | 0.019±0.0045   |       |

---
