# Supplementary material for: Pollinator Proboscis Length Plays a Key Role in Floral Integration of Honeysuckle Flowers (Lonicera spp.)
Source: MDPI journal article supplement (doi:10.3390/plants12081629), 2023-04-12
Supplement: s1 [file s1]

**Table S2** Comparison of evolutionary models in PGLS on association of floral integration (INT) with floral traits (corolla tube length, stigma height, upper lip length and lower lip length) and composite pollinator proboscis length (PLa). These models were modelled using Brownian motion (BM), Pagel's lambda (PL), as well as Ornstein-Uhlenbeck (OU). Models were evaluated by Akaike information criterion (AIC). Best-fitting models are shown in bold. “-“ means model was not significant ( $P > 0.05$ ).

| Model               |                   | AIC of each phylogenetic model |              |              |
|---------------------|-------------------|--------------------------------|--------------|--------------|
| predictor variable  | response variable | BM                             | PL           | OU           |
| corolla tube length | INT               | -                              | NA           | <b>76.94</b> |
| stigma height       | INT               | -                              | <b>77.35</b> | 77.94        |
| upper lip length    | INT               | -                              | <b>72.74</b> | 75.88        |
| lower lip length    | INT               | -                              | <b>73.72</b> | 76.85        |
| proboscis length    | INT               | -                              | <b>73.54</b> | 75.42        |
