# Supplementary material for: Pollinator Proboscis Length Plays a Key Role in Floral Integration of Honeysuckle Flowers (Lonicera spp.)
Source: Plants (Basel). 2023 Apr 12;12(8):1629. doi: 10.3390/plants12081629 (PMC10144162; doi:10.3390/plants12081629)
Supplement: Supplementary file 1 [file plants-12-01629-s001.zip]

Archive with 4 entries (4 files):
- Figure S1.jpeg
- Table S1.pdf
- Table S2.pdf
- Table S3.pdf
